# Supplementary material
Source: Elsevier journal article supplement (https://rcastoragev2.blob.core.windows.net/4ff77afe8b3fcf69e759d5f5b4b7b08e/mmc1.pdf)
Supplement: mmc1 [file mmc1.pdf]

# THE LANCET

## **Supplementary appendix**

This appendix formed part of the original submission and has been peer reviewed.  
We post it as supplied by the authors.

Supplement to: Watson AJM, Hudson J, Wood J, et al, on behalf of the eTHoS study group. Comparison of stapled haemorrhoidopexy with traditional excisional surgery for haemorrhoidal disease (eTHoS): a pragmatic, multicentre, randomised controlled trial. *Lancet* 2016; published online Oct 7. [http://dx.doi.org/10.1016/S0140-6736\(16\)31803-7](http://dx.doi.org/10.1016/S0140-6736(16)31803-7).

**Table 1 Further secondary analyses of the primary outcome**

|                                                                                                   | Stapled<br>haemorrhoidopexy<br>(n=388) | Traditional<br>excisional surgery<br>(n=386) | Mean<br>difference | 95% CI             | p value |
|---------------------------------------------------------------------------------------------------|----------------------------------------|----------------------------------------------|--------------------|--------------------|---------|
| <b>Per-protocol analysis for participants with at least one short and one long term follow-up</b> |                                        |                                              |                    |                    |         |
| 6 weeks                                                                                           | 0.225(0.151); 282                      | 0.197(0.142); 299                            | 0.029              | (0.010 to 0.048)   | 0.0038  |
| 12 months                                                                                         | 0.823(0.217); 240                      | 0.827(0.219); 243                            | -0.009             | (-0.040 to 0.022)  | 0.56    |
| 24 months                                                                                         | 1.555(0.478); 251                      | 1.623(0.418); 256                            | -0.078             | (-0.153 to 0.002)  | 0.0447  |
| <b>Multiple Imputation</b>                                                                        |                                        |                                              |                    |                    |         |
| <b>Participants that have either had surgery or at least one follow-up</b>                        |                                        |                                              |                    |                    |         |
| 6 weeks                                                                                           | 354                                    | 358                                          | 0.024              | (0.004 to 0.043)   | 0.0190  |
| 12 months                                                                                         | 360                                    | 367                                          | -0.012             | (-0.038 to 0.014)  | 0.35    |
| 24 months                                                                                         | 363                                    | 369                                          | -0.063             | (-0.111 to -0.015) | 0.0115  |
| <b>All participants randomised</b>                                                                |                                        |                                              |                    |                    |         |
| 6 weeks                                                                                           | 388                                    | 386                                          | 0.020              | (-0.002 to 0.042)  | 0.0704  |
| 12 months                                                                                         | 388                                    | 386                                          | -0.007             | (-0.345 to 0.018)  | 0.56    |
| 24 months                                                                                         | 388                                    | 386                                          | -0.054             | (-0.107 to -0.000) | 0.0450  |

Data are mean (SD);N

**Table 2. Subgroup analysis**

|                                 | Stapled<br>haemorrhoidopexy<br>(n=388) | Traditional excisional<br>surgery (n=386) | Mean difference | 99% CI            | p value |
|---------------------------------|----------------------------------------|-------------------------------------------|-----------------|-------------------|---------|
| <b>Gender</b>                   |                                        |                                           |                 |                   |         |
| Female                          | 1.531(0.502); 147                      | 1.626(0.414); 126                         | 0.055           | (-0.087 to 0.197) | 0.30    |
| Male                            | 1.582(0.464); 148                      | 1.612(0.446); 149                         |                 |                   |         |
| <b>Grade of<br/>haemorrhoid</b> |                                        |                                           |                 |                   |         |
| II                              | 1.545(0.492); 56                       | 1.532(0.467); 60                          | -0.072          | (-0.300 to 0.155) | 0.40    |
| III                             | 1.564(0.483); 196                      | 1.657(0.408); 171                         |                 |                   |         |
| IV                              | 1.536(0.482); 43                       | 1.585(0.458); 44                          |                 |                   |         |

Data are mean (SD);N

**Table 3. Pain, analgesia and return to usual activities (further secondary outcomes)**

|                                              | Stapled<br>haemorrhoidopexy<br>(n=388) | Traditional<br>excisional surgery<br>(n=386) | Effect<br>size* | 95% CI           | p value |
|----------------------------------------------|----------------------------------------|----------------------------------------------|-----------------|------------------|---------|
| Pain in first week following surgery         |                                        |                                              |                 |                  |         |
| Number of patients followed-up               | 301(78%)                               | 296(77%)                                     |                 |                  |         |
| Worst pain [Visual Analogue Scale]           | 6.9(2.5); 298                          | 7.9(2.2); 295                                | - 1.04          | (-1.59 to -0.49) | 0.0006  |
| Pain [Visual Analogue Scale]                 | 4.0(2.5); 299                          | 5.3(2.6); 296                                | - 1.35          | (-1.81 to -0.89) | <0.0001 |
| Analgesia                                    | 285(95%)                               | 286(97%)                                     | 0.57            | (0.27 to 1.19)   | 0.13    |
| Number of days with analgesia                | 5.8(1.7); 285                          | 6.4(1.3); 286                                | - 0.59          | (-0.98 to -0.20) | 0.0044  |
| Pain at three weeks post-surgery             |                                        |                                              |                 |                  |         |
| Number of patients followed-up               | 291(75%)                               | 282(73%)                                     |                 |                  |         |
| Pain [Visual Analogue Scale]                 | 1.8(2.2); 290                          | 2.6(2.5); 281                                | -0.72           | (-1.16 to -0.28) | 0.0026  |
| Analgesia                                    | 111(38%)                               | 145(51%)                                     | 0.58            | (0.45 to 0.75)   | <0.0001 |
| Number of days with analgesia                | 4.3(2.1); 111                          | 4.5(2.2); 145                                | -0.24           | (-0.75 to 0.27)  | 0.34    |
| Pain at six weeks post-surgery               |                                        |                                              |                 |                  |         |
| Number of patients followed-up               | 309(80%)                               | 305(79%)                                     |                 |                  |         |
| Pain [Visual Analogue Scale]                 | 1.3(2.0); 304                          | 1.3(1.9); 301                                | -0.01           | (-0.35 to 0.33)  | 0.96    |
| Analgesia                                    | 73(24%)                                | 67(22%)                                      | 1.11            | (0.73 to 1.68)   | 0.62    |
| Number of days in a week with analgesia      | 4.7(2.3); 72                           | 4.0(2.3); 67                                 | 0.58            | (-0.22 to 1.37)  | 0.15    |
| Returned to usual activities after six weeks | 276(89%)                               | 271(89%)                                     | 1.05            | (0.64 to 1.71)   | 0.85    |

Data are n (%) or mean (SD);N. \*Effect size is mean difference except for Analgesia, this was the odds ratio.

**Table 4. Total costs and QALYs gained at 24 months**

|                                | Costs     | Mean difference | 95% CI       | QALY        | Mean difference | 95% CI             | ICER      |
|--------------------------------|-----------|-----------------|--------------|-------------|-----------------|--------------------|-----------|
| Stapled haemorrhoidopexy       | 941 (415) |                 |              | 1.62 (0.43) |                 |                    | Dominated |
| Traditional excisional surgery | 602 (507) | 337             | (251 to 423) | 1.69 (0.38) | -0.070          | (-0.127 to -0.011) |           |

Data are mean(SD). QALYs =Quality adjusted life years. Dominated = Costs more and has less QALYs

**Table 5. Participants included in the analysis at each time point**

|           | Stapled haemorrhoidopexy (n=388) | Traditional excisional surgery (n=386) |
|-----------|----------------------------------|----------------------------------------|
| Baseline  | 0.781(0.244);295                 | 0.777(0.258);275                       |
| 1 week    | 0.605(0.307);271                 | 0.463(0.328);244                       |
| 3 weeks   | 0.804(0.244);263                 | 0.757(0.233);240                       |
| 6 weeks   | 0.843(0.221);281                 | 0.846(0.237);264                       |
| 12 months | 0.824(0.249);282                 | 0.884(0.205);262                       |
| 24 months | 0.837(0.247);263                 | 0.883(0.185);250                       |

Data are mean(SD);N
